# Supplementary material for: Exploration of Nitrate Reductase Metabolic Pathway inCorynebacterium pseudotuberculosis
Source: Hindawi journal article supplement (doi:10.1155/2017/9481756), 2017-01-01
Supplement: f1 [file 9481756.f1.pdf]

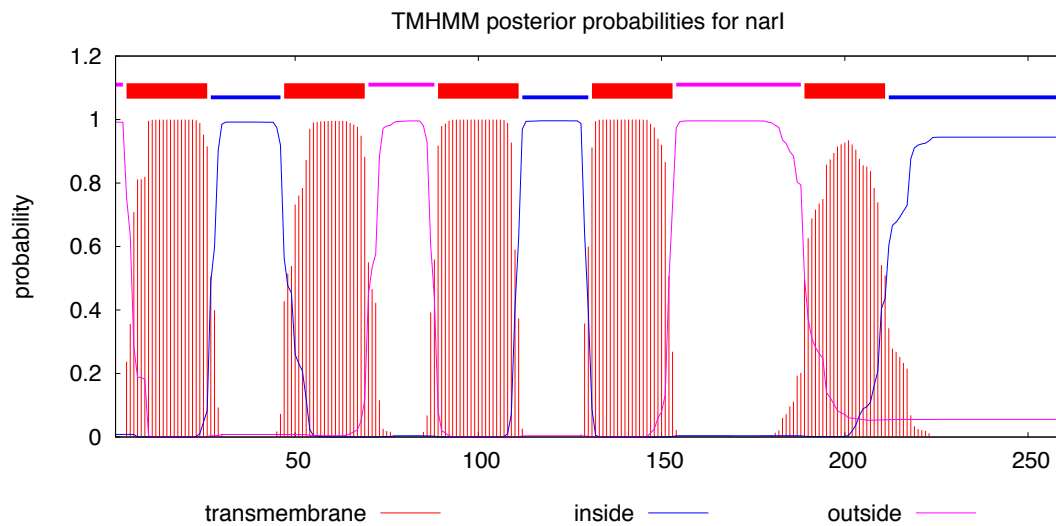

**S1 Figure. Transmembrane helices in NarI protein from *C. pseudotuberculosis* biovar Equi.**

NarI presented 5 transmembrane helices. The probability of a given amino acid being in transmembrane regions in the cytoplasmic or extracellular face is recorded in red, blue and pink, respectively. Prediction was performed with TMHMM 2.0 (<http://www.cbs.dtu.dk/services/TMHMM/>).

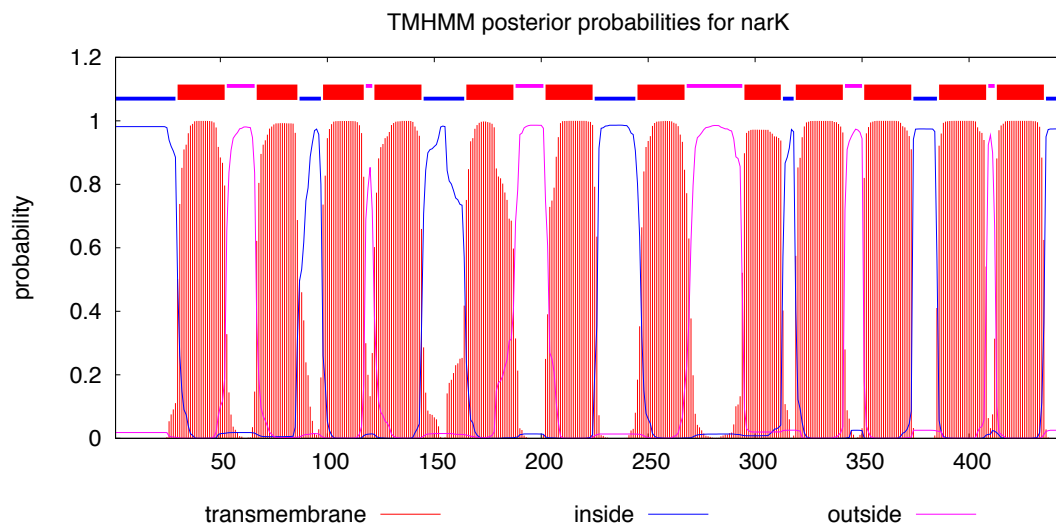

**S2 Figure. Transmembrane helices in NarK protein from *C. pseudotuberculosis* biovar Equi.**

NarK presented 12 transmembrane helices. Prediction was performed with TMHMM 2.0 (<http://www.cbs.dtu.dk/services/TMHMM/>).

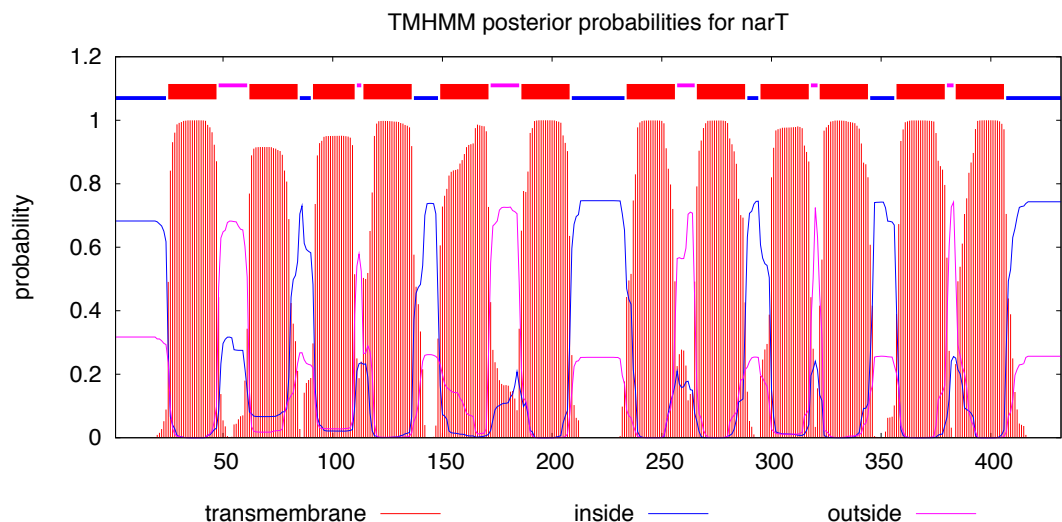

**S3 Figure. Transmembrane helices in NarT protein from *C. pseudotuberculosis* biovar Equi.**

NarT presented 12 transmembrane helices. Prediction was performed with TMHMM 2.0 (<http://www.cbs.dtu.dk/services/TMHMM/>).

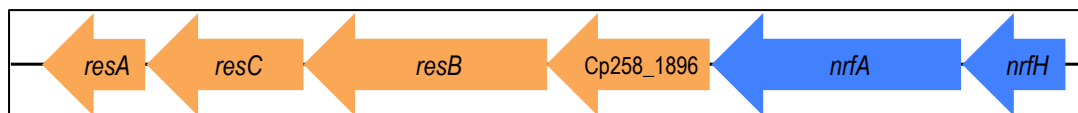

**S4 Figure. Transcription unit for the *narfHA* genes into *C. pseudotuberculosis* biovar Equi.**

Genomic coordinate of 2046902 (*narfH*) to 2052315 (*resA*). This region corresponds to 5414 pb length.

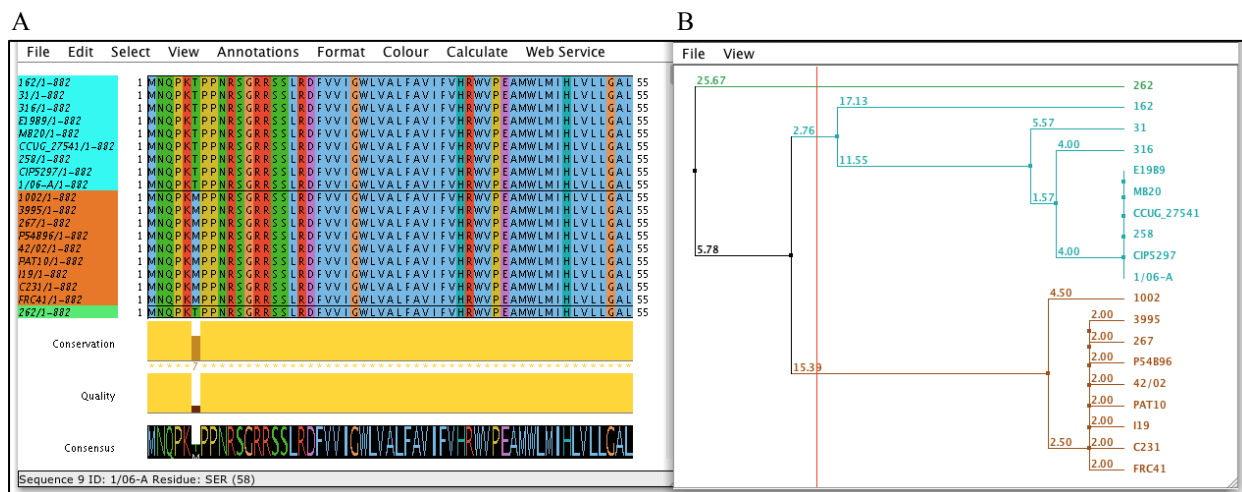

**S5 Figure. Multiple Sequences alignment of *C. pseudotuberculosis* biovar Equi *nirK* gene.**

In (A) multiple alignment using Clustal Omega with default settings. Alignment was visualized in Jalview. In (B) Phylogenetic trees of *nirK* inferred by Jalview program with the average distance using BLOSUM62. Sequences for each species have been deposited in the GenBank databases, access number Table 1.

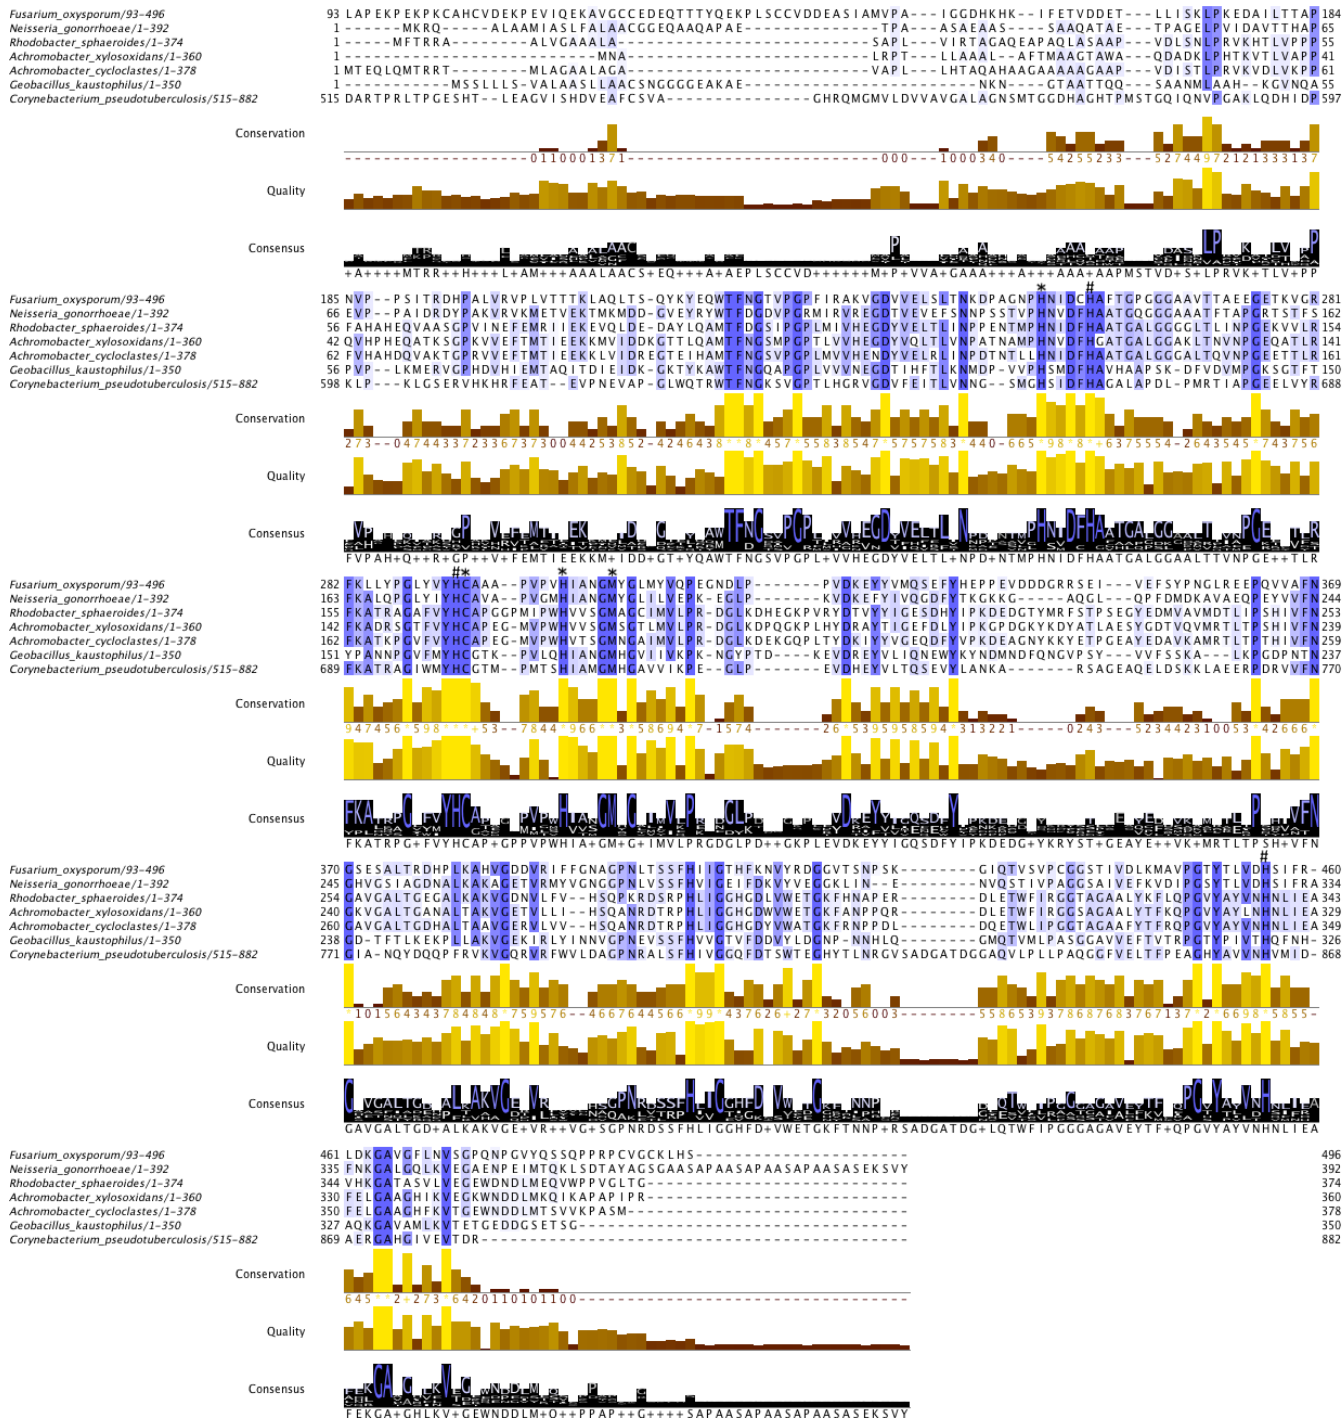

**S6 Figure. Amino acid sequence alignment of bacterial NirKs.**

Multiple alignment, the program used is ClustalO. Shading highlights amino acid residues of bacterial CuNiRs colored by percentage identity. Putative Cu-binding residues for type 1 and type 2 Cu are indicated by \* and #, respectively. Accession numbers of the sequences shown here are as follows: *F. oxysporum* (EF600898); *N. gonorrhoeae* (GenBank M97926); *R. sphaeroides* (Rs) (GenBank U62291), *A. xylosoxidans* (EMBL AF051831), and *A. cycloclastes* (GenBank Z48635), *G. kaustophilus* (GenBank GAD15255.1). In B) Similarity sequence analysis between *nirk* from *C. pseudotuberculosis* and bacterial CuNiRs.

**Table S1** – Similarity sequence analysis of *nirK* gene of *C. pseudotuberculosis* and bacterial CuNiRs

| <i>C. pseudotuberculosis</i> Protein                                                | Species                             | Lenght (aa) | ID (%) | Similarity (%) |
|-------------------------------------------------------------------------------------|-------------------------------------|-------------|--------|----------------|
| Nitrite reductase enzyme likely dependent on copper (CuNIR) ( <i>nirK</i> ) - 882aa | <i>Fusarium oxysporum</i>           | 375         | 32     | 48             |
|                                                                                     | <i>Neisseria gonorrhoeae</i>        | 392         | 33     | 50             |
|                                                                                     | <i>Rhodobacter sphaeroides</i>      | 355         | 32     | 44             |
|                                                                                     | <i>Achromobacter xylosoxidans</i>   | 360         | 30     | 44             |
|                                                                                     | <i>Achromobacter Cycloclastes</i>   | 340         | 32     | 46             |
|                                                                                     | <i>Geobacillus kaustophilus</i>     | 351         | 35     | 51             |
|                                                                                     | <i>Corynebacterium durum</i>        | 867         | 40     | 54             |
|                                                                                     | <i>Corynebacterium vitaeruminis</i> | 845         | 40     | 54             |

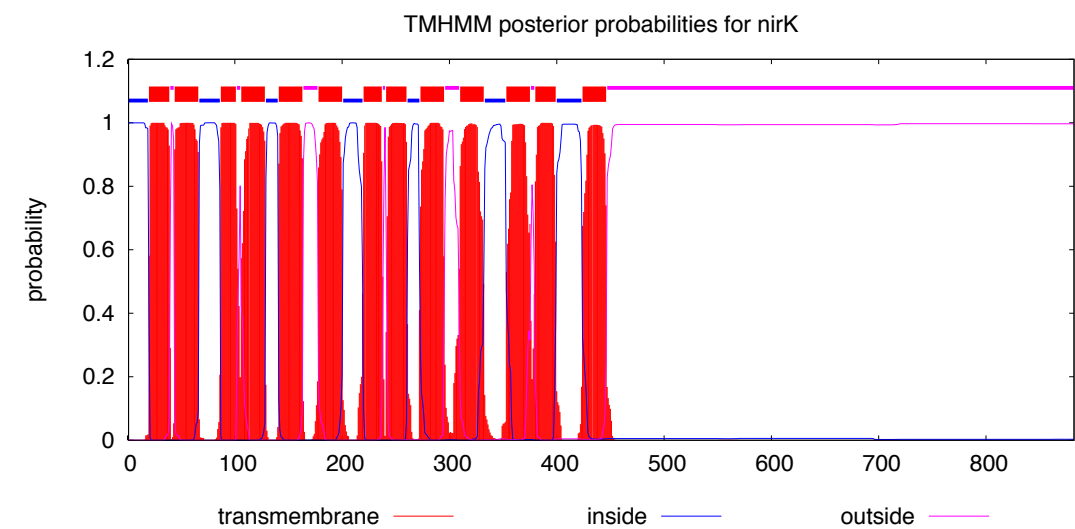

**S7 Figure. Transmembrane helices in *nirK* protein from *C. pseudotuberculosis* biovar *Equi*.** NirK presented 13 transmembrane helices. Prediction was performed with TMHMM 2.0 (<http://www.cbs.dtu.dk/services/TMHMM/>).

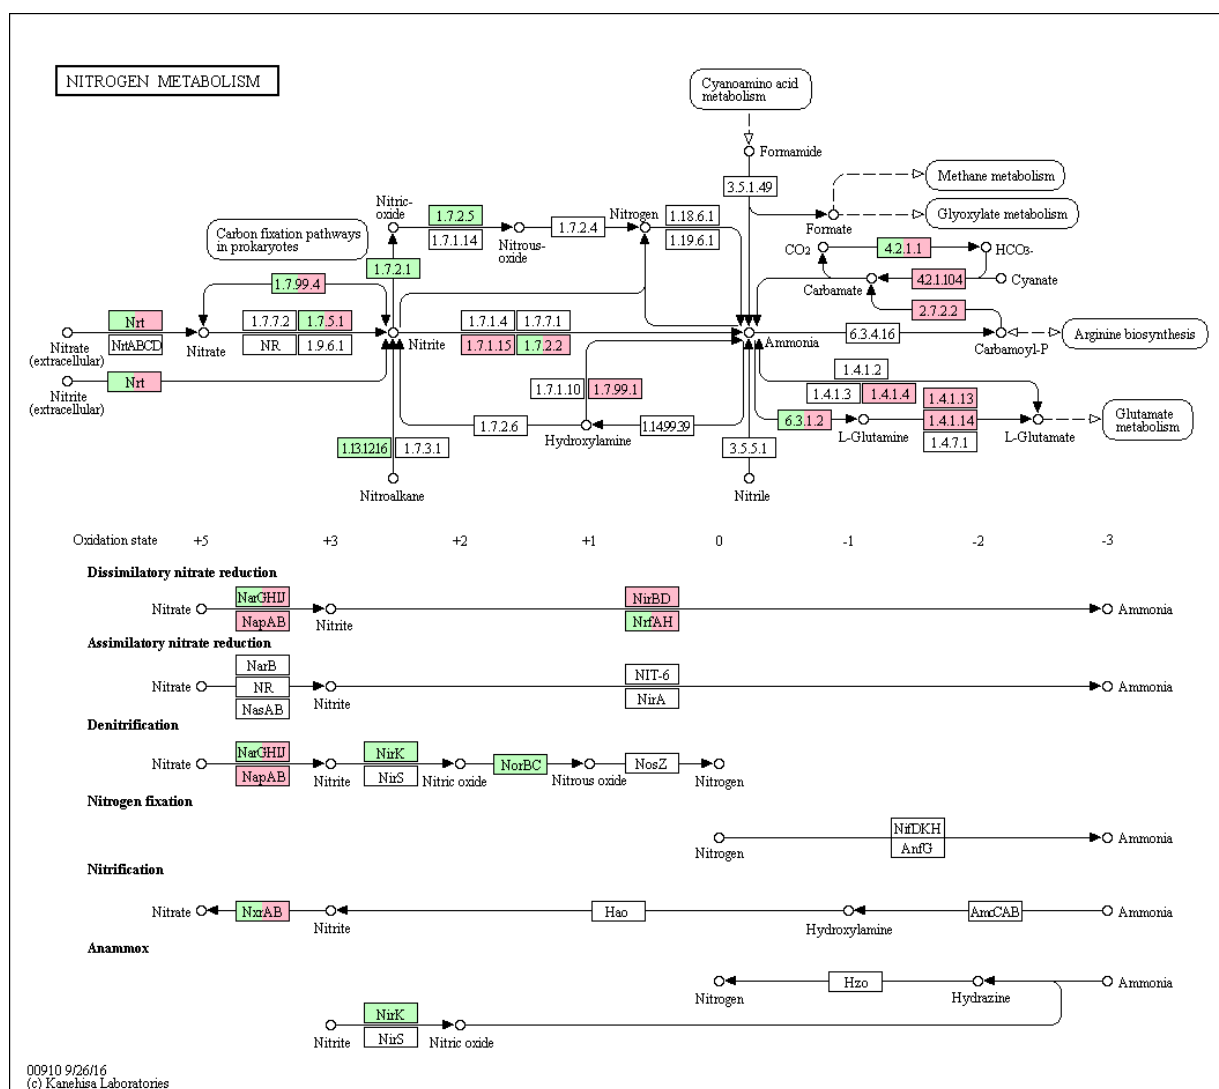

**S8 Figure. Comparative nitrogen metabolism between *E.coli* and *C. pseudotuberculosis* biovar Equi.** In red pathway to *E. coli*, in green to *C. pseudotuberculosis*. Prediction was performed with KEGG (<http://www.genome.jp/kegg/>).
